# Supplementary material for: New Triterpenoids and Anti-Inflammatory Constituents from Glinus oppositifolius
Source: MDPI journal article supplement (doi:10.3390/molecules28072903), 2023-03-23
Supplement: s1 [file s1]

## Supplementary data

# New Triterpenoids and Anti-inflammatory Constituents from *Glinus oppositifolius*

Jih-Jung Chen <sup>1,2,†</sup>, Chang-Syun Yang <sup>1,†</sup>, Yu-Hui Chen <sup>3</sup>, Che-Yi Chao <sup>4</sup>, Yu-Chang Chen <sup>5</sup> and Yeuh-Hsiung Kuo <sup>3,6,7,\*</sup>

<sup>1</sup> Department of Pharmacy, School of Pharmaceutical Sciences, National Yang Ming Chiao Tung University, Taipei 112304, Taiwan; jjungchen@nycu.edu.tw (J.-J.C.); tim0619@nycu.edu.tw (C.-S.Y.)

<sup>2</sup> Department of Medical Research, China Medical University Hospital, China Medical University, Taichung 40402, Taiwan

<sup>3</sup> Department of Chinese Pharmaceutical Sciences and Chinese Medicine Resources, China Medical University, Taichung 40402, Taiwan; chenyh2@airproducts.com (Y.-H.C.)

<sup>4</sup> Department of Food Nutrition and Health Biotechnology, Asia University, Taichung 41354, Taiwan; chenyj@asia.edu.tw

<sup>5</sup> School of Pharmacy, College of Pharmacy, Kaohsiung Medical University, Kaohsiung 807, Taiwan; yuchang@kmu.edu.tw

<sup>6</sup> Chinese Medicine Research Center, China Medical University, Taichung 404, Taiwan

<sup>7</sup> Department of Biotechnology, Asia University, Taichung 413, Taiwan

† These authors contributed equally to this work

\* Correspondence: kuoyh@mail.cmu.edu.tw; Tel.: +886-4-2205-3366-5701

## Contents

|                                                                                                                                                                  |     |
|------------------------------------------------------------------------------------------------------------------------------------------------------------------|-----|
| <b>Table S1.</b> Inhibitory effect of compounds <b>1–20</b> on production of nitric oxide in LPS-stimulated RAW 264.7 cells.....                                 | S4  |
| <b>Table S2.</b> Inhibitory effect of compounds <b>1–20</b> on the production of pro-inflammatory cytokine, TNF- $\alpha$ in LPS-stimulated RAW 264.7 cells..... | S5  |
| <b>Figure S1.</b> The IR spectrum of <b>1</b> .....                                                                                                              | S6  |
| <b>Figure S2.</b> The $^1\text{H}$ -NMR spectrum of <b>1</b> ( $\text{CDCl}_3$ , 500 MHz).....                                                                   | S6  |
| <b>Figure S3.</b> The $^{13}\text{C}$ -NMR spectrum of <b>1</b> ( $\text{CDCl}_3$ , 125 MHz).....                                                                | S7  |
| <b>Figure S4.</b> The $^{13}\text{C}$ -DEPT spectrum of <b>1</b> ( $\text{CDCl}_3$ , 125 MHz).....                                                               | S7  |
| <b>Figure S5.</b> The $^1\text{H}$ - $^1\text{H}$ COSY spectrum of <b>1</b> .....                                                                                | S8  |
| <b>Figure S6.</b> The NOESY spectrum of <b>1</b> .....                                                                                                           | S8  |
| <b>Figure S7.</b> The HSQC spectrum of <b>1</b> .....                                                                                                            | S9  |
| <b>Figure S8.</b> The HMBC spectrum of <b>1</b> .....                                                                                                            | S9  |
| <b>Figure S9.</b> The IR spectrum of <b>2</b> .....                                                                                                              | S10 |
| <b>Figure S10.</b> The $^1\text{H}$ -NMR spectrum of <b>2</b> ( $\text{CDCl}_3$ , 500 MHz).....                                                                  | S10 |
| <b>Figure S11.</b> The $^{13}\text{C}$ -NMR spectrum of <b>2</b> ( $\text{CDCl}_3$ , 125 MHz).....                                                               | S11 |
| <b>Figure S12.</b> The $^{13}\text{C}$ -DEPT spectrum of <b>2</b> ( $\text{CDCl}_3$ , 125 MHz).....                                                              | S11 |
| <b>Figure S13.</b> The $^1\text{H}$ - $^1\text{H}$ COSY spectrum of <b>2</b> .....                                                                               | S12 |
| <b>Figure S14.</b> The NOESY spectrum of <b>2</b> .....                                                                                                          | S12 |
| <b>Figure S15.</b> The HSQC spectrum of <b>2</b> .....                                                                                                           | S13 |
| <b>Figure S16.</b> The HMBC spectrum of <b>2</b> .....                                                                                                           | S13 |
| <b>Figure S17.</b> The IR spectrum of <b>3</b> .....                                                                                                             | S14 |
| <b>Figure S18.</b> The $^1\text{H}$ -NMR spectrum of <b>3</b> ( $\text{CDCl}_3$ , 500 MHz).....                                                                  | S14 |

|                                                                                              |     |
|----------------------------------------------------------------------------------------------|-----|
| Figure S19. The $^{13}\text{C}$ -NMR spectrum of <b>3</b> ( $\text{CDCl}_3$ , 125 MHz).....  | S15 |
| Figure S20. The $^{13}\text{C}$ -DEPT spectrum of <b>3</b> ( $\text{CDCl}_3$ , 125 MHz)..... | S15 |
| Figure S21. The $^1\text{H}$ - $^1\text{H}$ COSY spectrum of <b>3</b> .....                  | S16 |
| Figure S22. The NOESY spectrum of <b>3</b> .....                                             | S16 |
| Figure S23. The HSQC spectrum of <b>3</b> .....                                              | S17 |
| Figure S24. The HMBC spectrum of <b>3</b> .....                                              | S17 |

Table S1. Inhibitory effect of compounds **1–20** on production of nitric oxide in LPS-stimulated RAW 264.7 cells.

| Compounds                                                     | N1     | N2     | N3     | NO inhibition<br>IC <sub>50</sub> (μM) <sup>a</sup> |
|---------------------------------------------------------------|--------|--------|--------|-----------------------------------------------------|
| Spergulagenin B ( <b>1</b> )                                  | 25.00  | 23.35  | 25.93  | 24.76 ± 1.41 ***                                    |
| Spergulagenin C ( <b>2</b> )                                  | 31.04  | 25.59  | 28.15  | 28.26 ± 2.78 **                                     |
| Spergulagenin D ( <b>3</b> )                                  | 15.79  | 16.99  | 18.31  | 17.03 ± 1.28                                        |
| Kaempferol ( <b>4</b> )                                       | 40.55  | 39.01  | 37.33  | 38.87 ± 1.68 ***                                    |
| 6,8-Dimethyl-5,7,4'-tri-<br>hydroxyflavone ( <b>5</b> )       | 18.33  | 19.24  | 17.06  | 18.21 ± 1.15                                        |
| 5,7-Dihydroxy-6,8-<br>dimethylflavone ( <b>6</b> )            | 43.82  | 46.46  | 40.65  | 43.61 ± 2.96 ***                                    |
| 5,4'-Dihydroxy-7-methoxy-6,8-<br>dimethylflavone ( <b>7</b> ) | 31.95  | 29.46  | 34.83  | 32.08 ± 2.75 **                                     |
| 4-Hydroxybenzoic acid ( <b>8</b> )                            | 69.20  | 76.00  | 82.29  | 75.83 ± 6.63 **                                     |
| 4-Hydroxybenzaldehyde ( <b>9</b> )                            | 95.98  | 80.63  | 87.99  | 88.20 ± 7.78 **                                     |
| 4-Hydroxyacetophenone ( <b>10</b> )                           | 69.90  | 76.03  | 82.79  | 76.24 ± 6.55 **                                     |
| Methyl 4-Hydroxybenzoate ( <b>11</b> )                        | 78.44  | 70.56  | 86.50  | 78.50 ± 8.00 **                                     |
| <i>p</i> -Anisic acid ( <b>12</b> )                           | 125.81 | 105.23 | 115.70 | 115.58 ± 10.35 **                                   |
| Vanillin ( <b>13</b> )                                        | 83.96  | 105.88 | 95.01  | 94.95 ± 10.99 **                                    |
| 4-Hydroxy-3-methoxy-<br>acetophenone ( <b>14</b> )            | 123.20 | 111.02 | 98.65  | 111.29 ± 12.91 **                                   |
| Acetosyringone ( <b>15</b> )                                  | 75.37  | 68.86  | 82.06  | 75.43 ± 6.63 **                                     |
| 4-Hydroxy-3, 5-dimethoxy-<br>benzaldehyde ( <b>16</b> )       | 86.50  | 94.36  | 79.00  | 86.62 ± 7.74 **                                     |
| 4-Hydroxybenzyl alcohol ( <b>17</b> )                         | 78.72  | 85.79  | 71.41  | 78.64 ± 7.23 **                                     |
| 2-(4-Hydroxyphenyl)ethanol ( <b>18</b> )                      | 30.33  | 28.55  | 26.53  | 28.47 ± 1.94 ***                                    |
| Cinnamic acid ( <b>19</b> )                                   | 15.20  | 17.71  | 15.99  | 16.30 ± 1.41                                        |
| <i>trans</i> -Ferulic acid ( <b>20</b> )                      | 13.87  | 12.51  | 11.63  | 12.64 ± 1.14 **                                     |
| Quercetin <sup>b</sup>                                        | 17.94  | 16.80  | 15.48  | 16.74 ± 1.26                                        |

<sup>a</sup> The IC<sub>50</sub> value was defined as half-maximal inhibitory concentration and was expressed as mean ± SD (n = 3); <sup>b</sup> Quercetin was used as positive control; \* *p* < 0.05, \*\**p* < 0.01, \*\*\**p* < 0.001 compared with the control.

Table S2. Inhibitory effect of compounds **1–20** on the production of pro-inflammatory cytokine, TNF- $\alpha$  in LPS-stimulated RAW 264.7 cells.

| Compounds                                                     | N1     | N2     | N3     | TNF- $\alpha$ inhibition<br>IC <sub>50</sub> ( $\mu$ M) <sup>a</sup> |
|---------------------------------------------------------------|--------|--------|--------|----------------------------------------------------------------------|
| Spergulagenin B ( <b>1</b> )                                  | 28.54  | 30.24  | 32.69  | 30.49 $\pm$ 2.20 **                                                  |
| Spergulagenin C ( <b>2</b> )                                  | 33.95  | 31.00  | 29.13  | 31.36 $\pm$ 2.59 **                                                  |
| Spergulagenin D ( <b>3</b> )                                  | 18.24  | 19.69  | 17.12  | 18.35 $\pm$ 1.34 **                                                  |
| Kaempferol ( <b>4</b> )                                       | 30.97  | 40.71  | 35.45  | 35.71 $\pm$ 4.74 *                                                   |
| 6,8-Dimethyl-5,7,4'-tri-<br>hydroxyflavone ( <b>5</b> )       | 16.15  | 19.30  | 17.23  | 17.56 $\pm$ 1.41 **                                                  |
| 5,7-Dihydroxy-6,8-<br>dimethylflavone ( <b>6</b> )            | 39.21  | 42.81  | 36.42  | 9.48 $\pm$ 3.06 **                                                   |
| 5,4'-Dihydroxy-7-methoxy-6,8-<br>dimethylflavone ( <b>7</b> ) | 31.68  | 36.27  | 34.56  | 34.17 $\pm$ 2.49 **                                                  |
| 4-Hydroxybenzoic acid ( <b>8</b> )                            | 72.97  | 87.12  | 79.97  | 80.02 $\pm$ 7.10 **                                                  |
| 4-Hydroxybenzaldehyde ( <b>9</b> )                            | 80.49  | 92.66  | 85.99  | 86.38 $\pm$ 6.28 ***                                                 |
| 4-Hydroxyacetophenone ( <b>10</b> )                           | 84.29  | 78.97  | 73.83  | 79.03 $\pm$ 5.26 ***                                                 |
| Methyl 4-Hydroxybenzoate ( <b>11</b> )                        | 75.40  | 82.01  | 89.58  | 82.33 $\pm$ 7.25 **                                                  |
| <i>p</i> -Anisic acid ( <b>12</b> )                           | 137.14 | 126.01 | 114.37 | 125.84 $\pm$ 11.47 **                                                |
| Vanillin ( <b>13</b> )                                        | 111.71 | 102.22 | 93.12  | 102.35 $\pm$ 9.36 **                                                 |
| 4-Hydroxy-3-methoxy-<br>acetophenone ( <b>14</b> )            | 122.90 | 111.87 | 134.44 | 123.07 $\pm$ 11.37 **                                                |
| Acetosyringone ( <b>15</b> )                                  | 73.86  | 68.17  | 63.11  | 68.38 $\pm$ 5.48 **                                                  |
| 4-Hydroxy-3, 5-dimethoxy-<br>benzaldehyde ( <b>16</b> )       | 70.80  | 77.25  | 84.12  | 77.39 $\pm$ 6.73 **                                                  |
| 4-Hydroxybenzyl alcohol ( <b>17</b> )                         | 69.50  | 61.62  | 77.02  | 69.38 $\pm$ 7.64 **                                                  |
| 2-(4-Hydroxyphenyl)ethanol ( <b>18</b> )                      | 24.14  | 28.79  | 26.39  | 26.44 $\pm$ 2.35 *                                                   |
| Cinnamic acid ( <b>19</b> )                                   | 20.54  | 23.51  | 21.95  | 22.00 $\pm$ 1.51 **                                                  |
| <i>trans</i> -Ferulic acid ( <b>20</b> )                      | 14.38  | 15.45  | 14.27  | 14.27 $\pm$ 1.29 **                                                  |
| Quercetin <sup>b</sup>                                        | 5.28   | 5.11   | 4.85   | 5.08 $\pm$ 0.23                                                      |

<sup>a</sup> The IC<sub>50</sub> value was defined as half-maximal inhibitory concentration and was expressed as mean  $\pm$  SD (n = 3); <sup>b</sup> Quercetin was used as positive control; \*  $p$  < 0.05, \*\* $p$  < 0.01, and \*\*\* $p$  < 0.001 compared with the control.

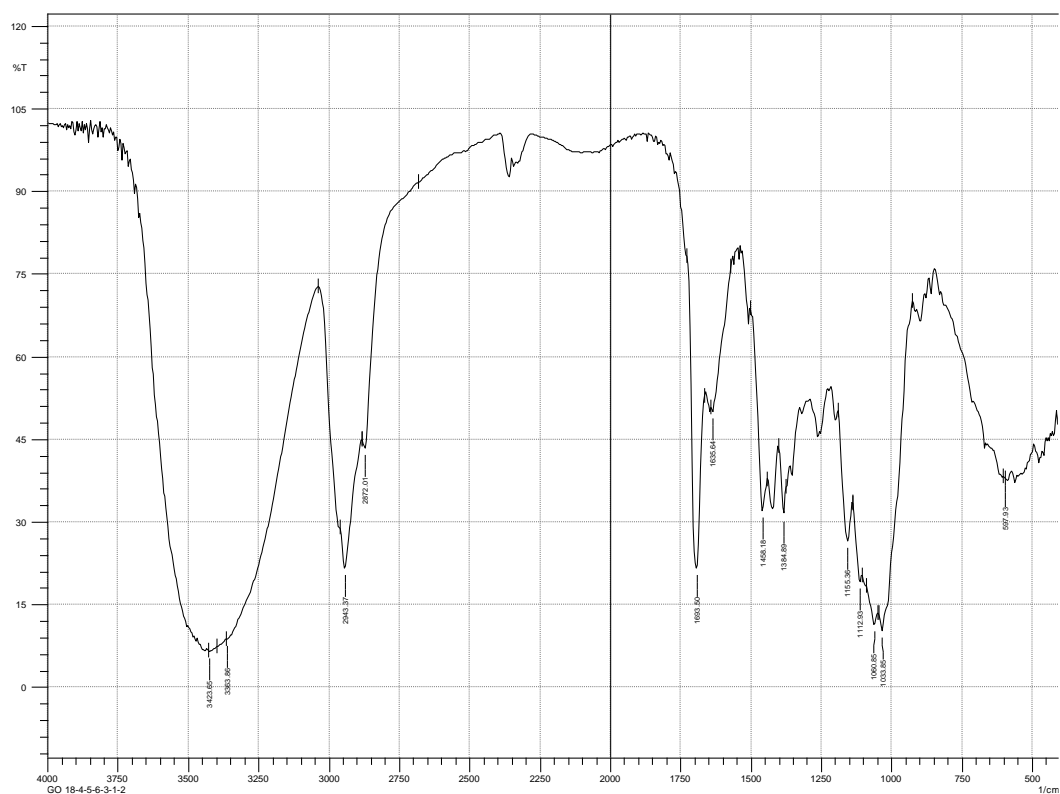

Figure S1. IR spectrum of **1**.

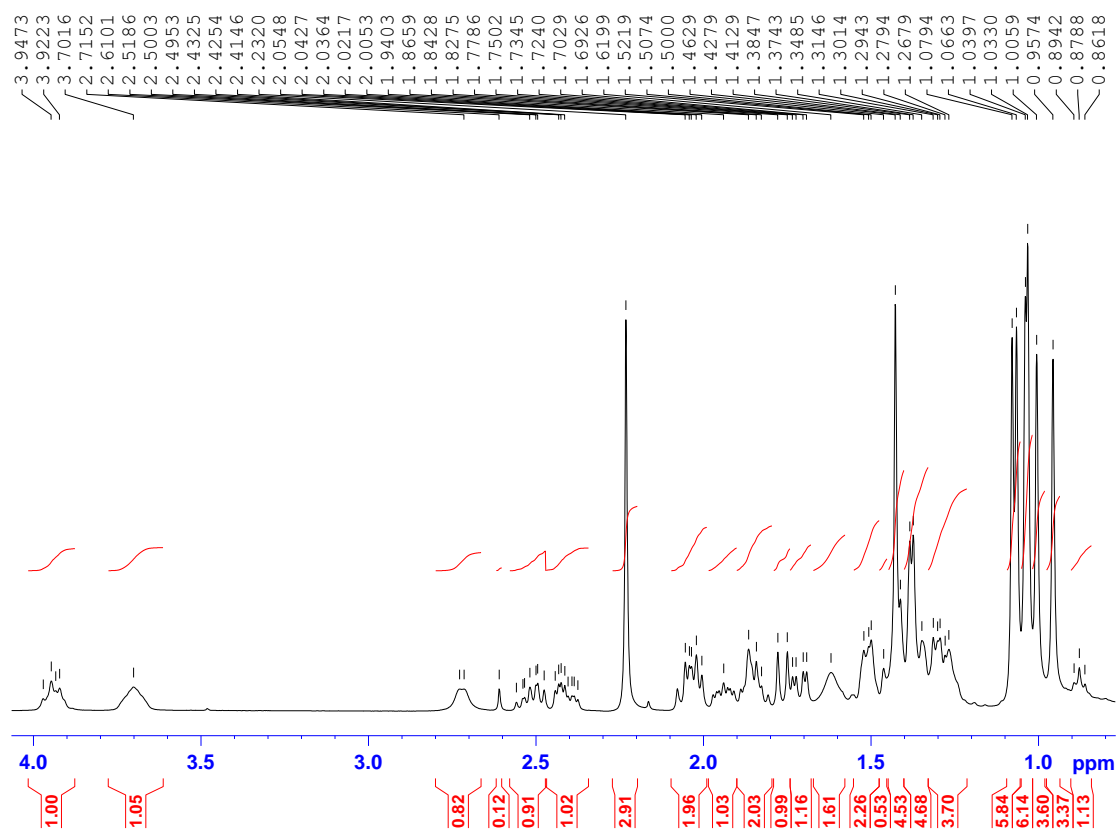

Figure S2.  $^1\text{H}$ -NMR spectrum of **1** ( $\text{CDCl}_3$ , 500 MHz).

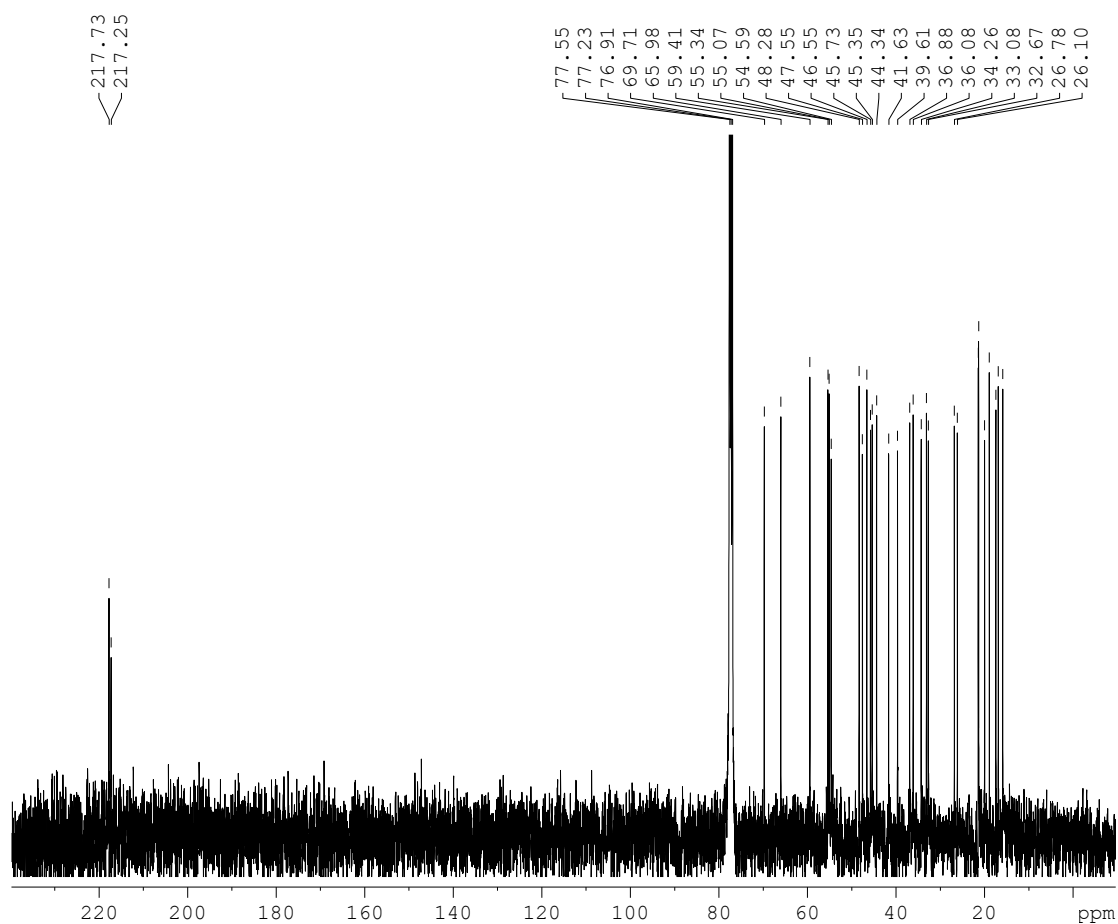

Figure S3.  $^{13}\text{C}$ -NMR spectrum of **1** ( $\text{CDCl}_3$ , 125 MHz).

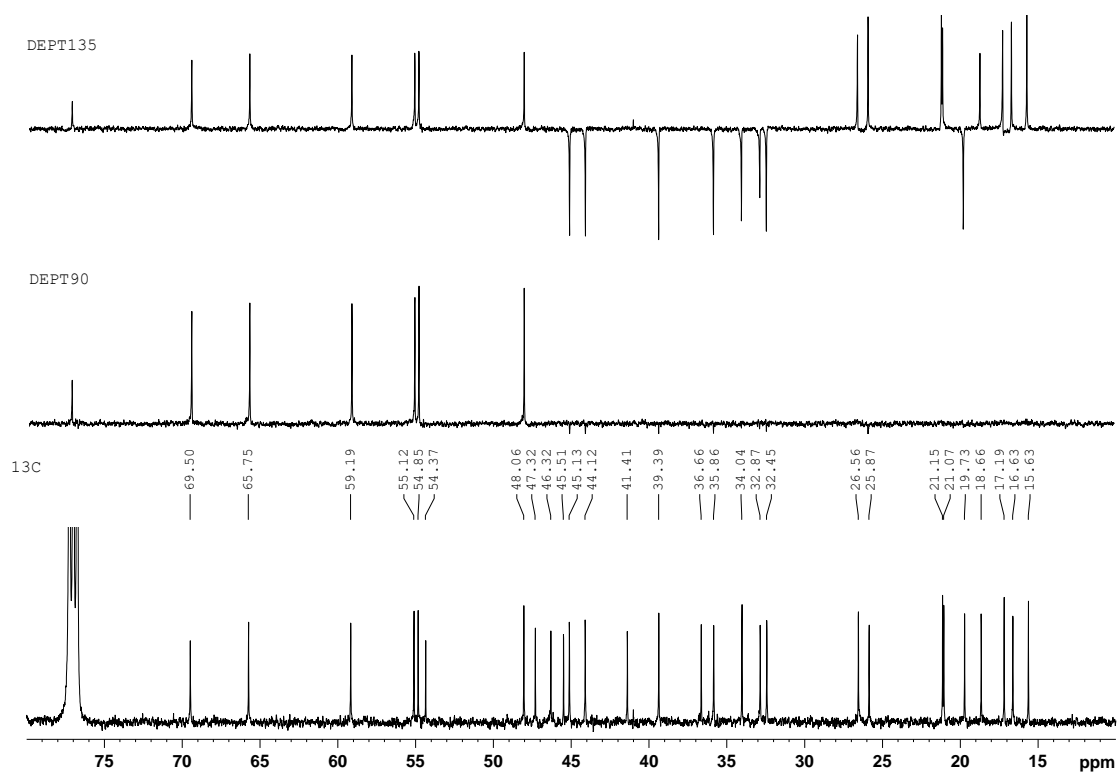

Figure S4.  $^{13}\text{C}$ -DEPT spectrum of **1** ( $\text{CDCl}_3$ , 125 MHz).

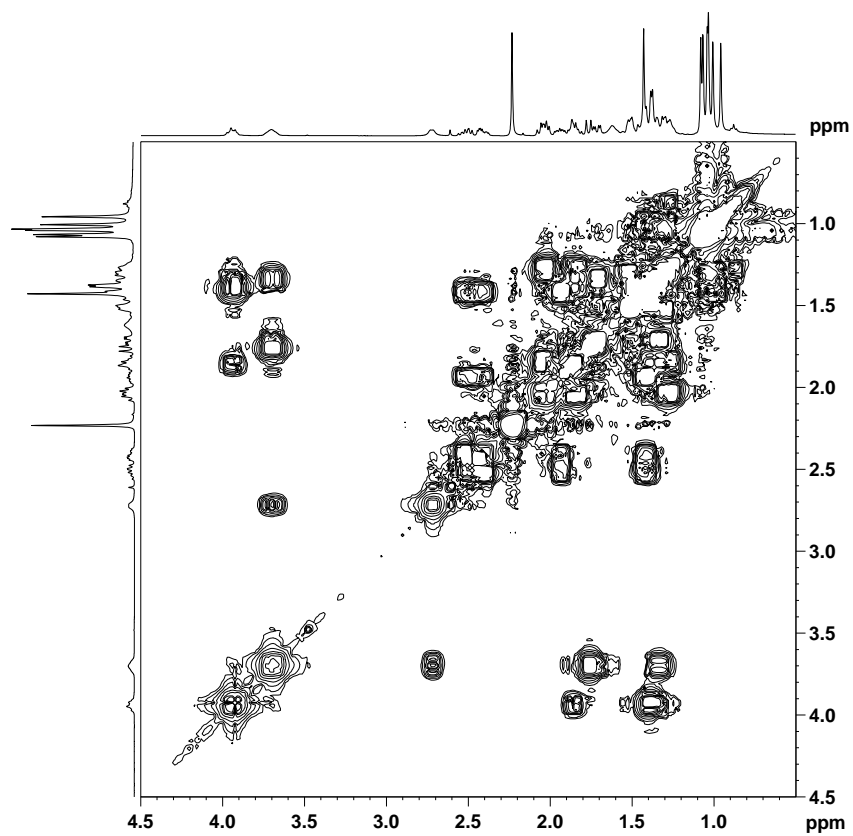

Figure S5.  $^1\text{H}$ - $^1\text{H}$  COSY spectrum of **1**.

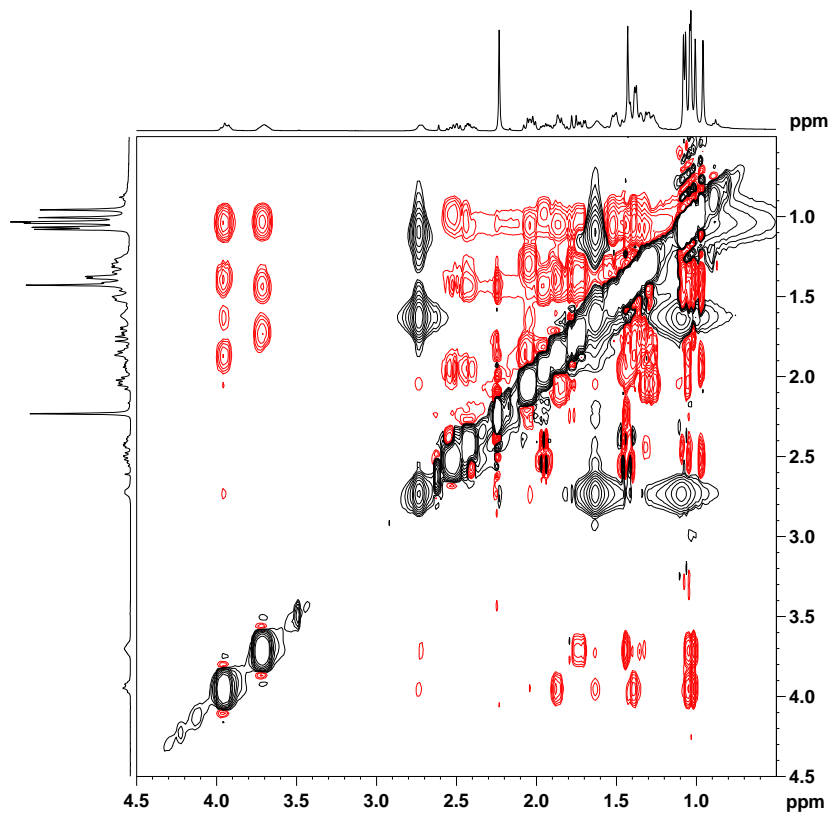

Figure S6. NOESY spectrum of **1**.



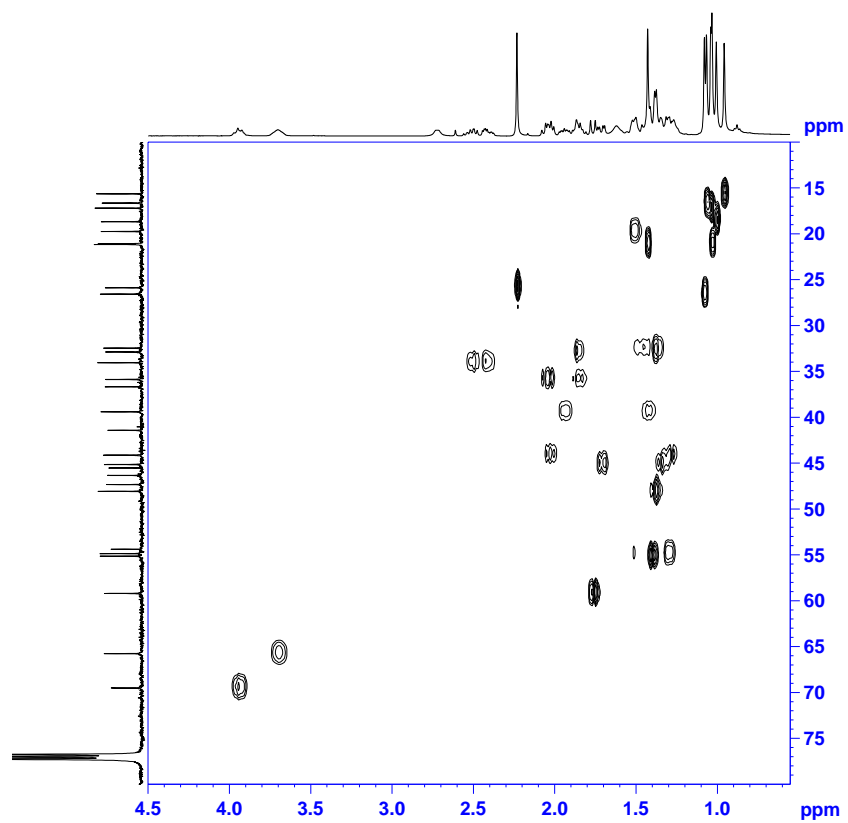

Figure S7. HSQC spectrum of **1**.

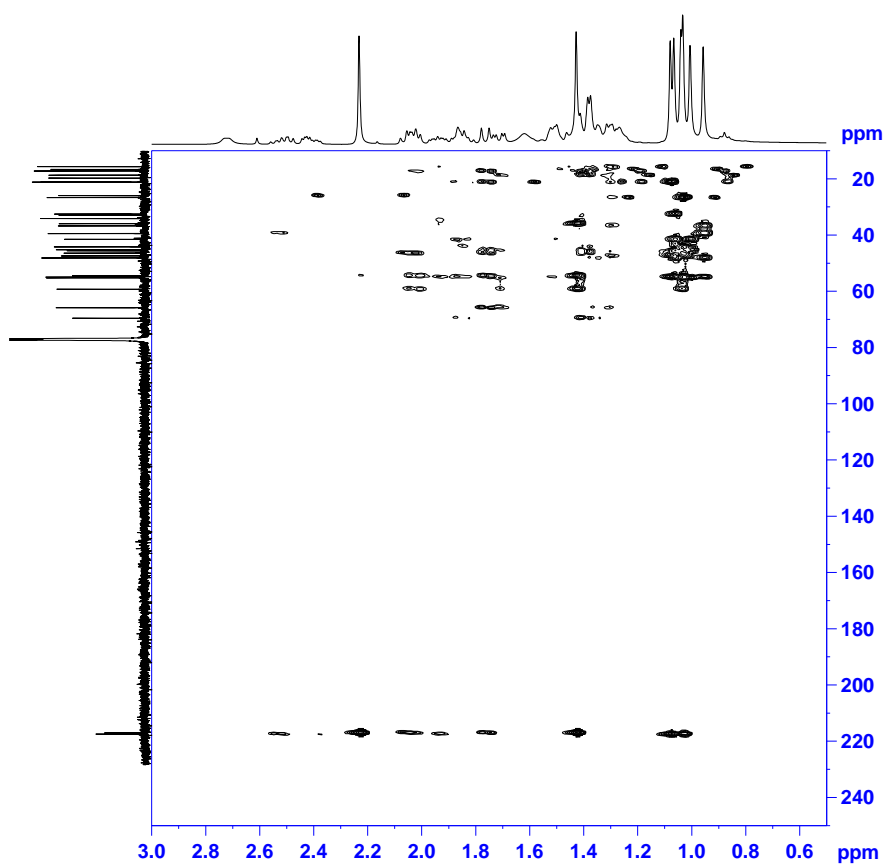

Figure S8. HMBC spectrum of **1**.

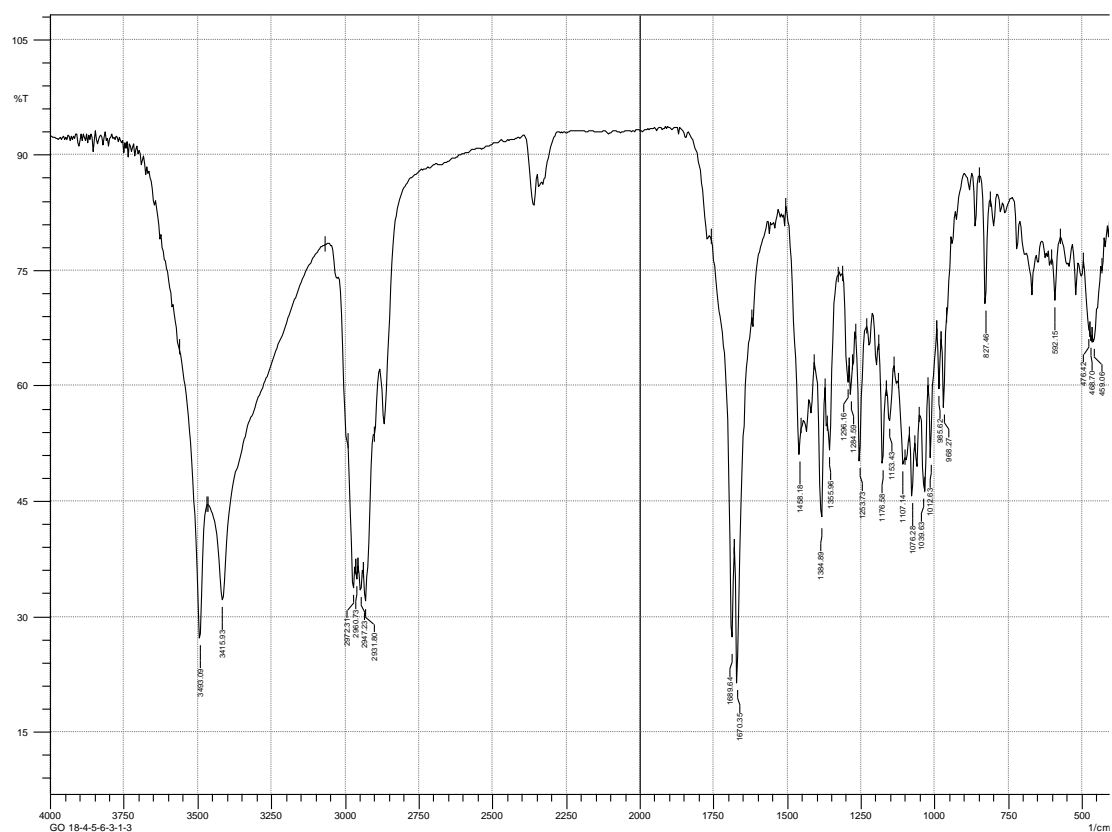

Figure S9. IR spectrum of **2**.

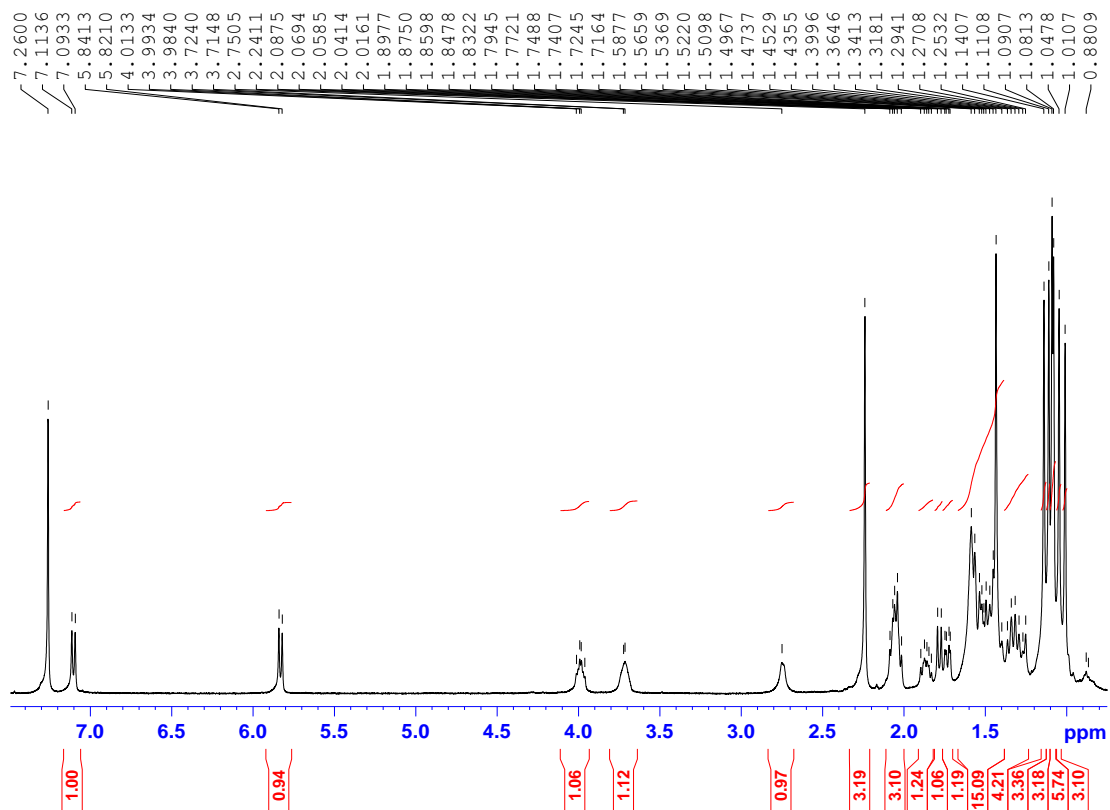

Figure S10. <sup>1</sup>H-NMR spectrum of **2** (CDCl<sub>3</sub>, 500 MHz).

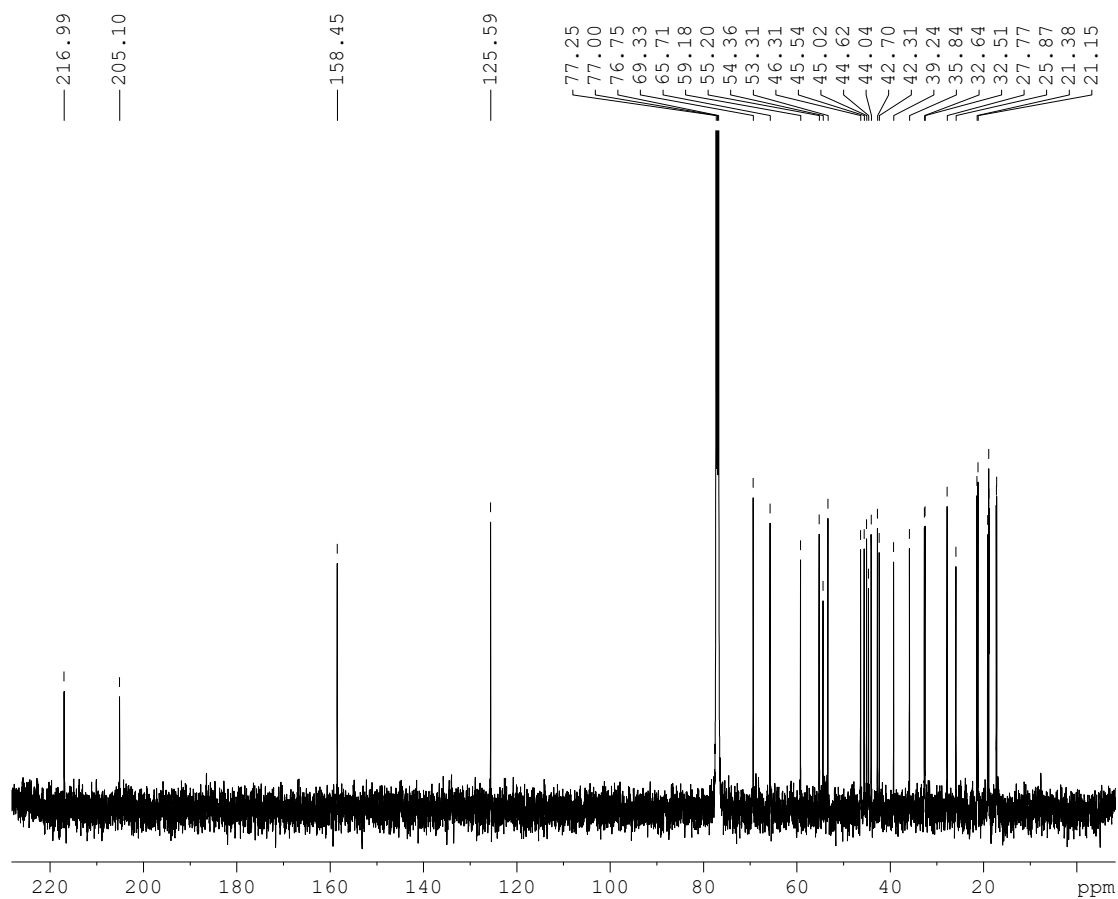

Figure S11.  $^{13}\text{C}$ -NMR spectrum of **2** ( $\text{CDCl}_3$ , 125 MHz).

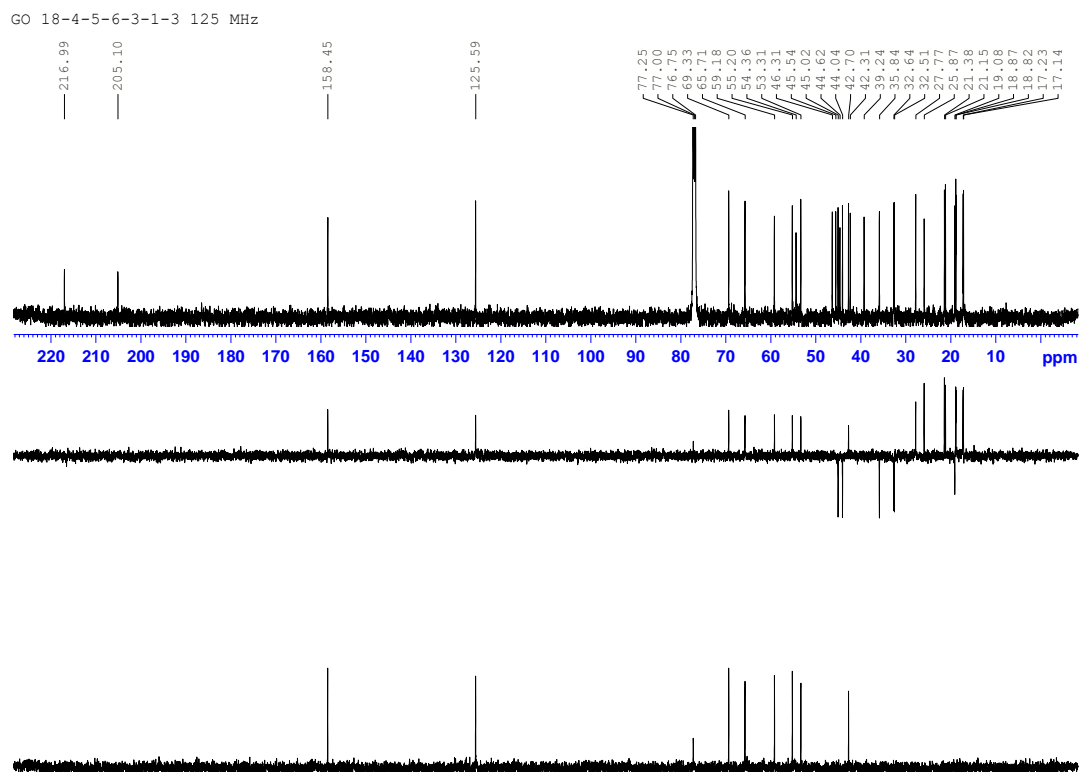

Figure S12.  $^{13}\text{C}$ -DEPT spectrum of **2** ( $\text{CDCl}_3$ , 125 MHz).

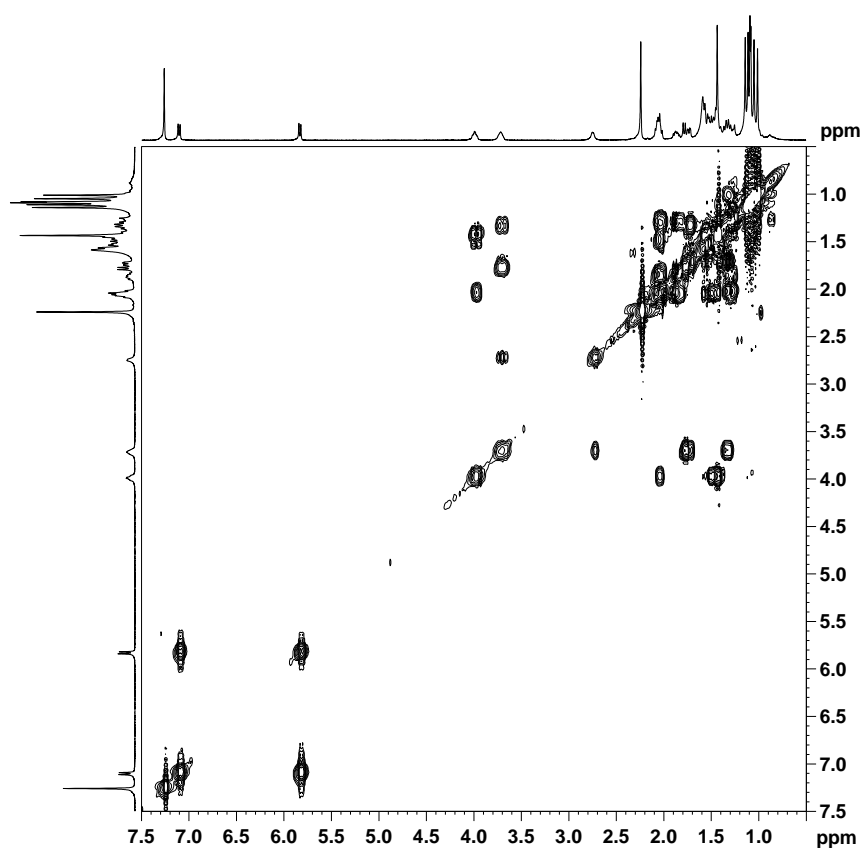

Figure S13.  $^1\text{H}$ - $^1\text{H}$  COSY spectrum of **2**.

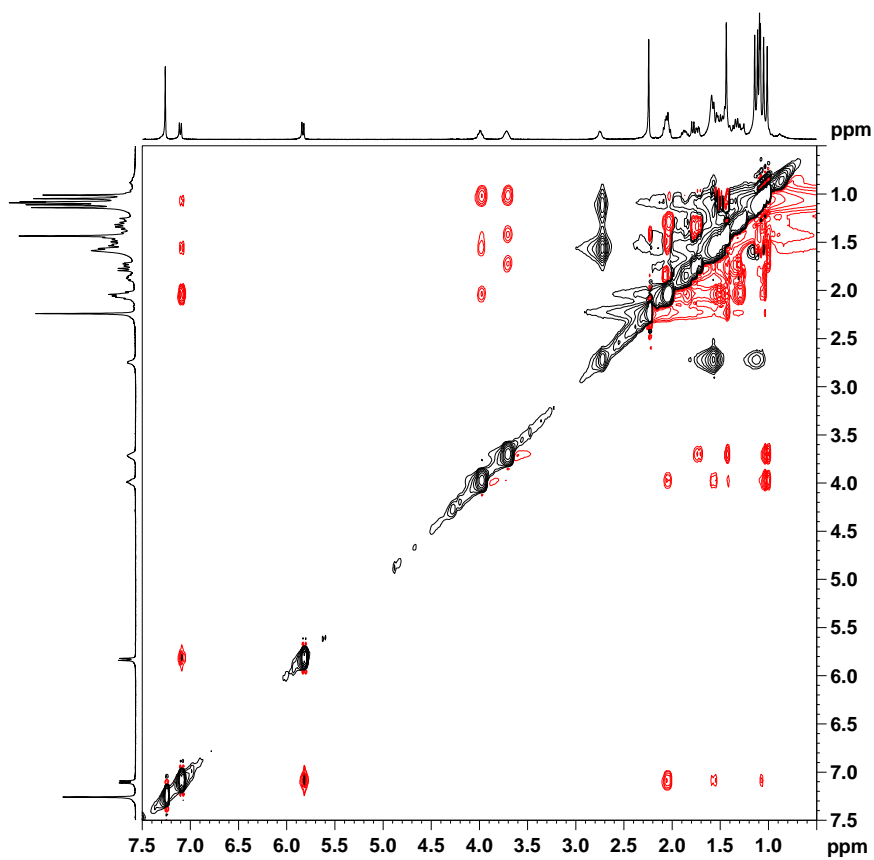

Figure S14. NOESY spectrum of **2**.

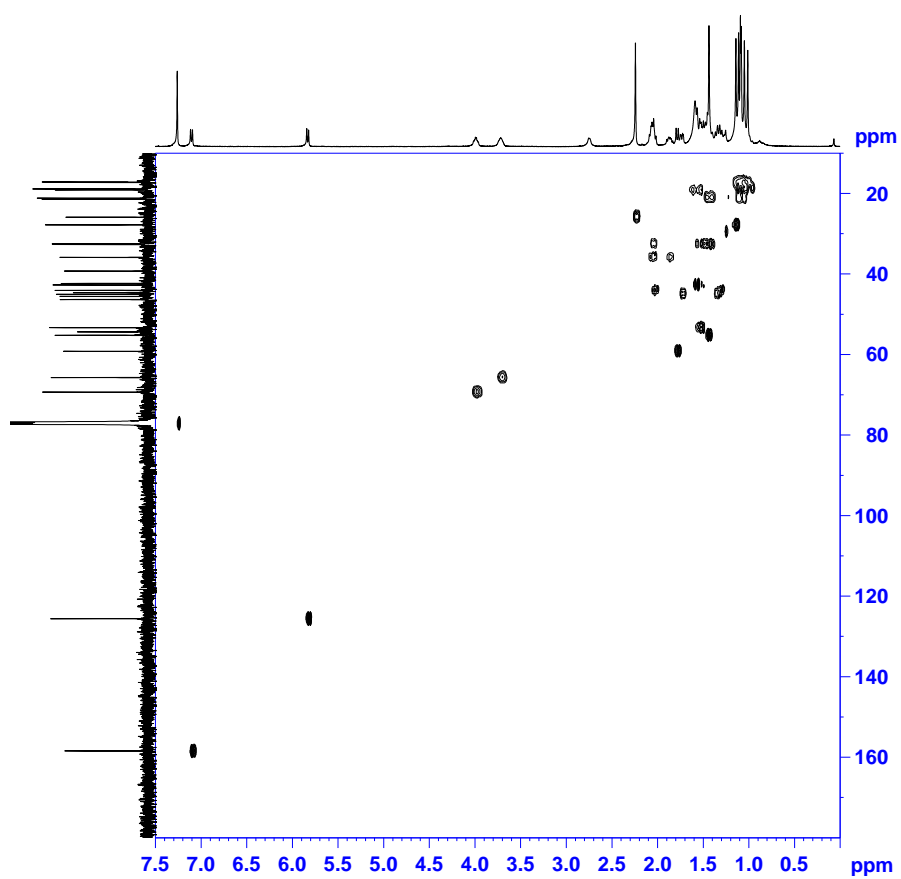

Figure S15. HSQC spectrum of 2.

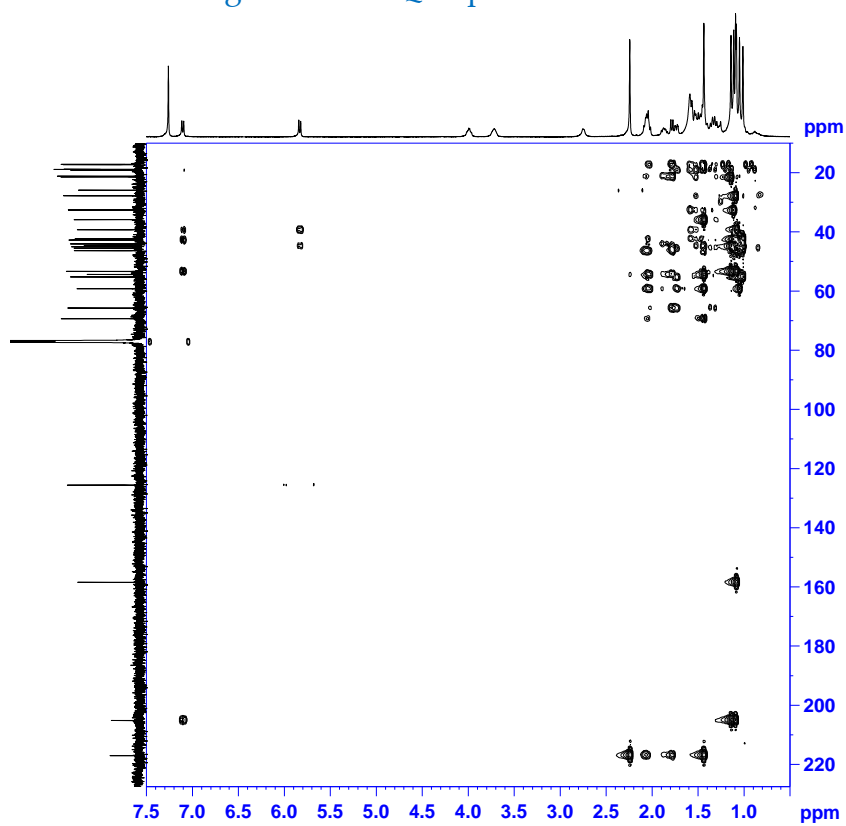

Figure S16. HMBC spectrum of 2.

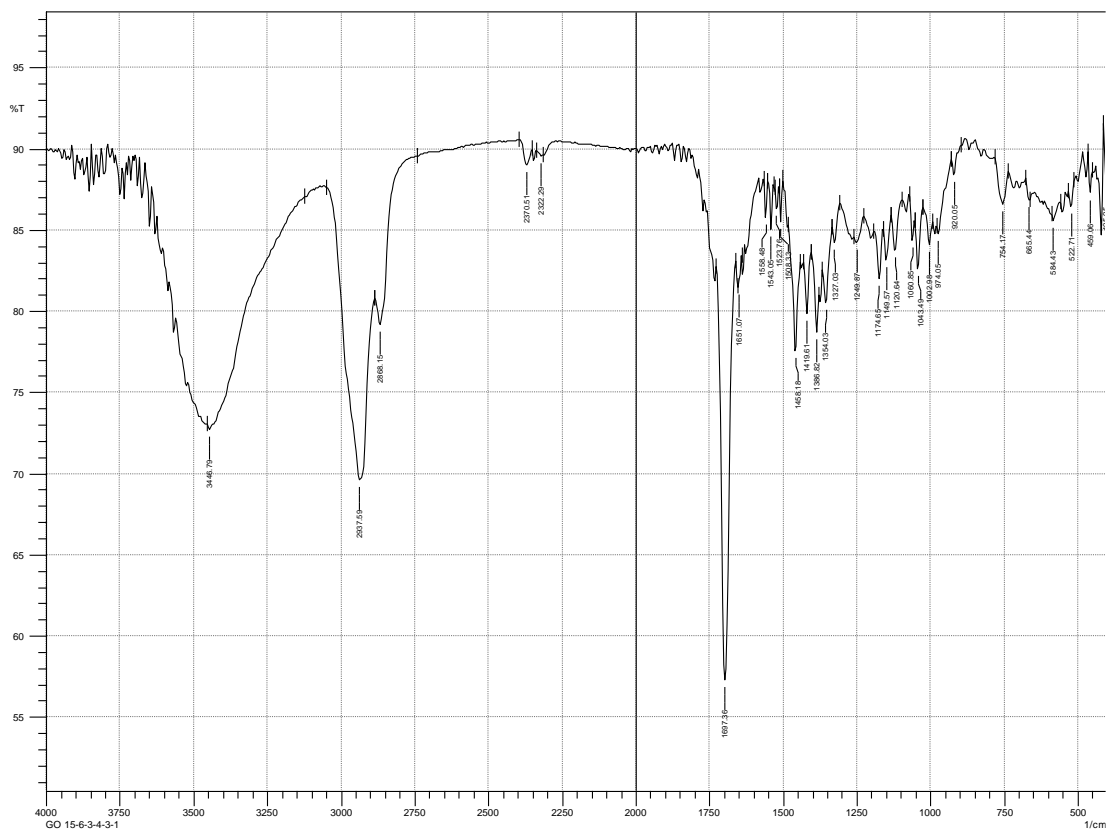

Figure S17. IR spectrum of 3.

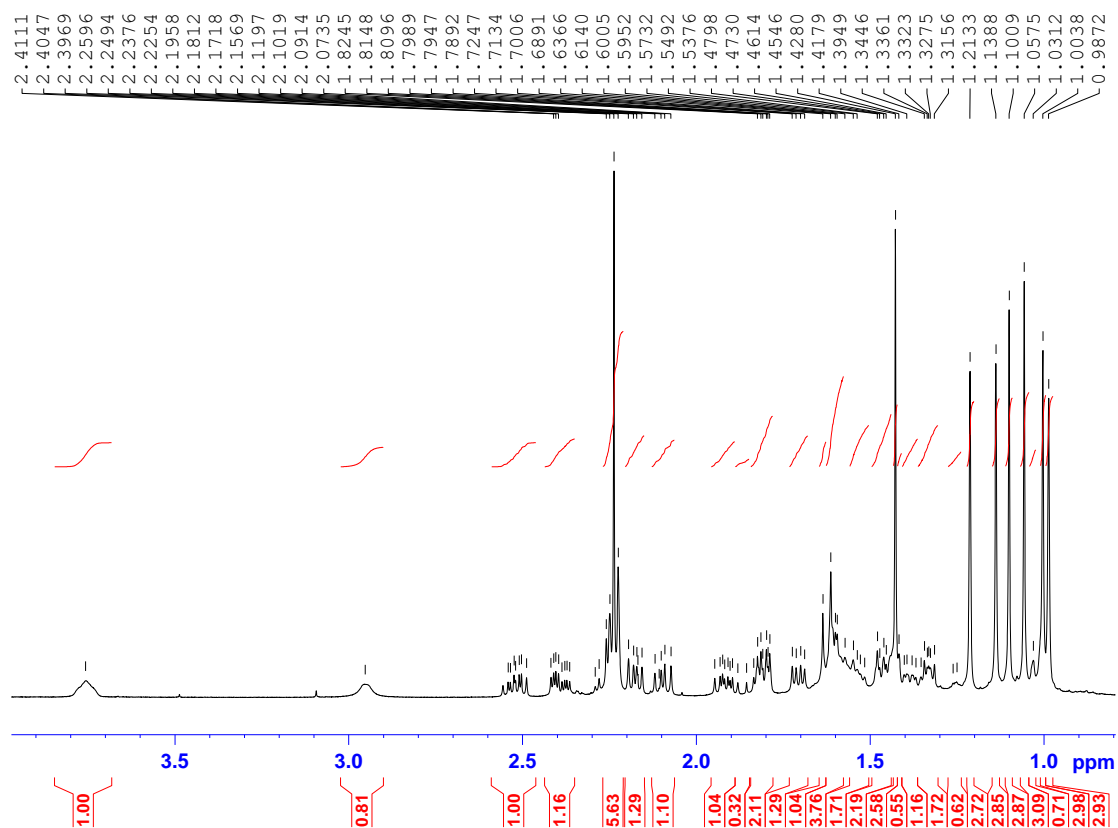

Figure S18.  $^1\text{H}$ -NMR spectrum of 3 ( $\text{CDCl}_3$ , 500 MHz).

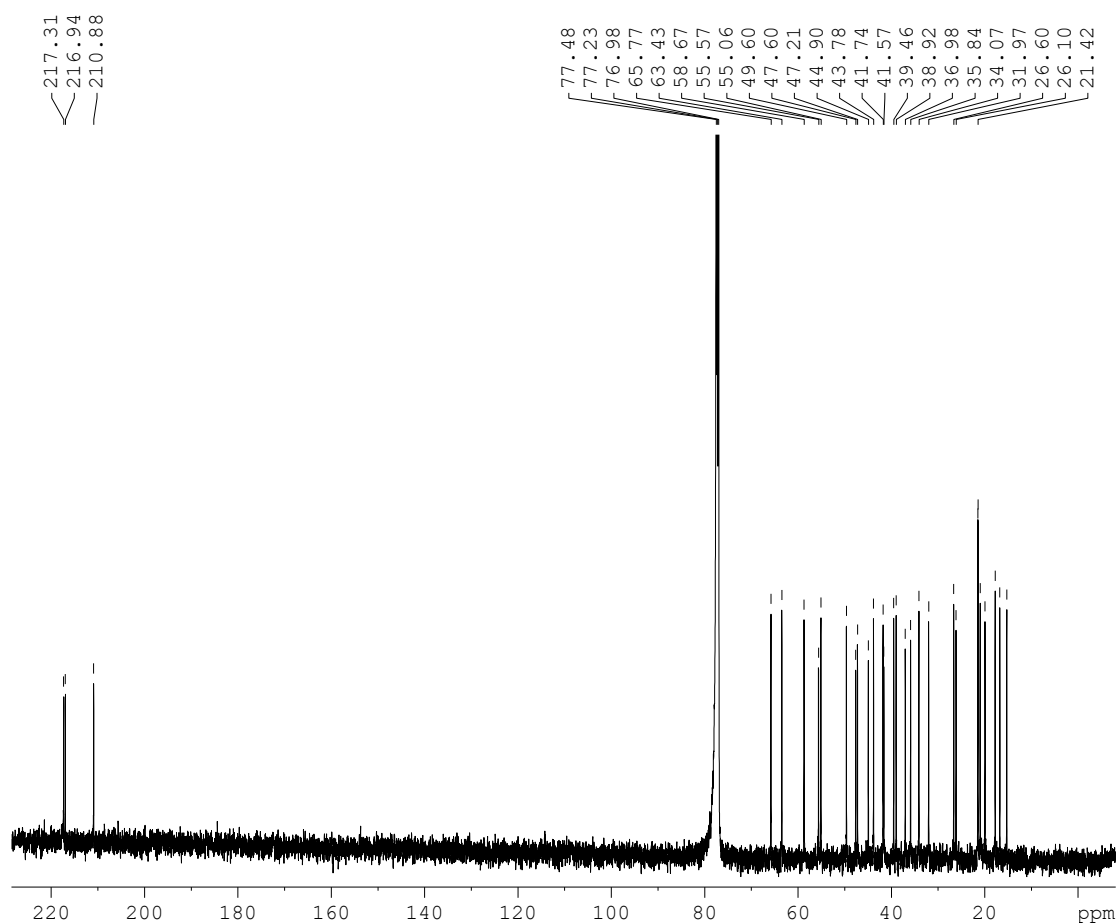

Figure S19.  $^{13}\text{C}$ -NMR spectrum of **3** ( $\text{CDCl}_3$ , 125 MHz).

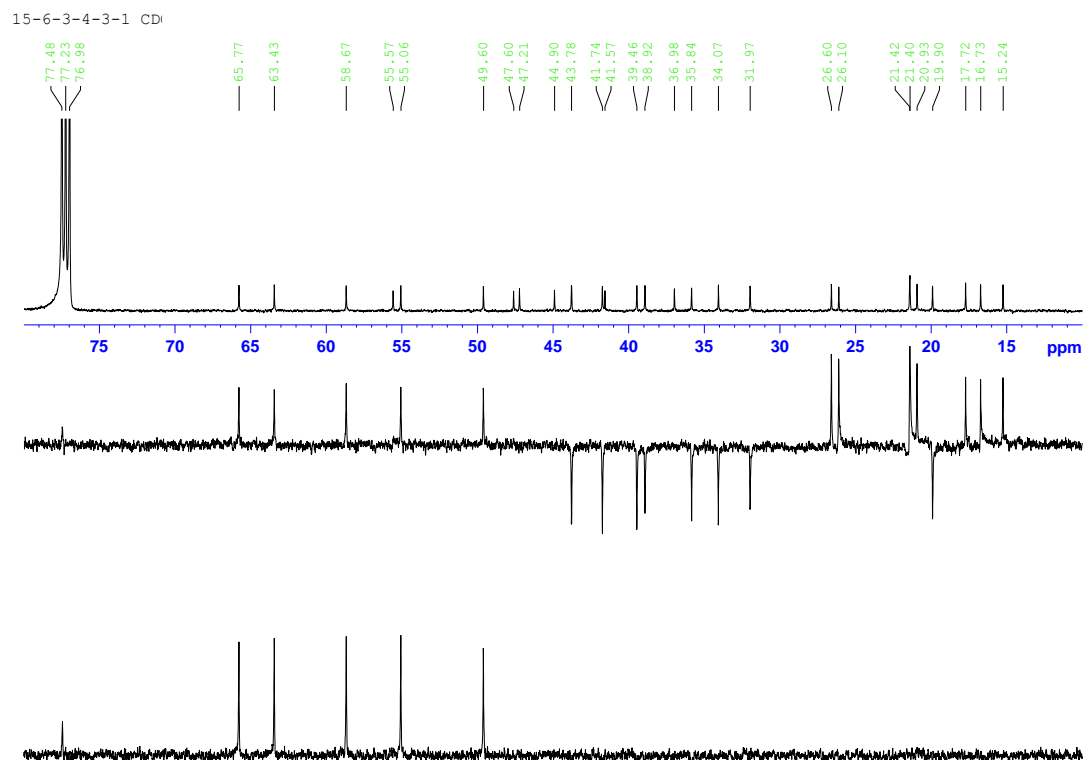

Figure S20.  $^{13}\text{C}$ -DEPT spectrum of **3** ( $\text{CDCl}_3$ , 125 MHz).

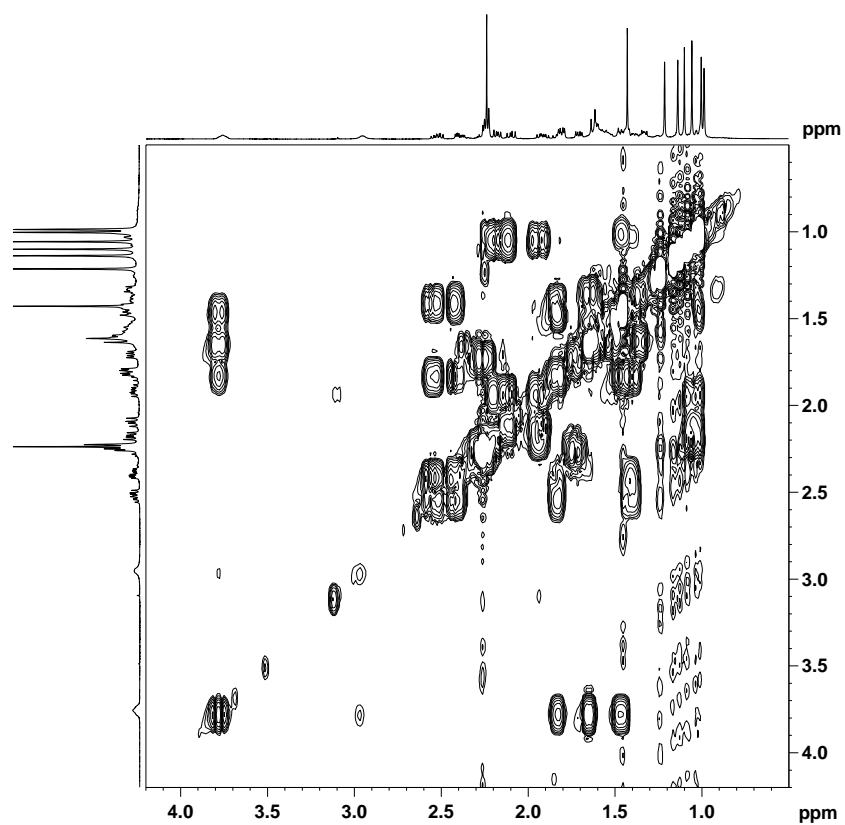

Figure S21.  $^1\text{H}$ - $^1\text{H}$  COSY spectrum of **3**.

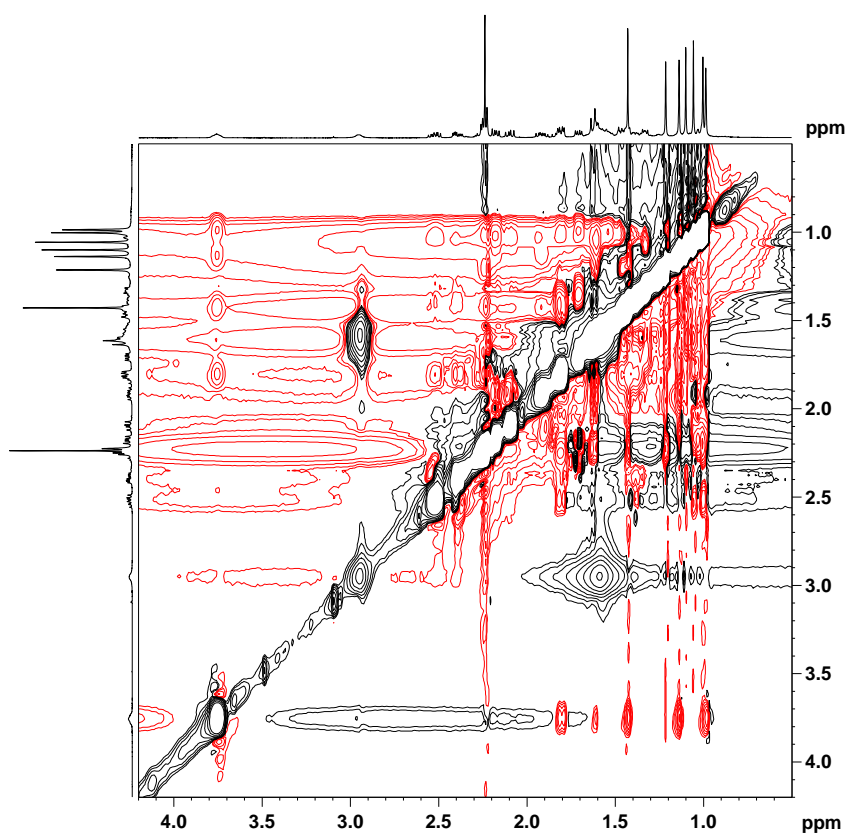

Figure S22. NOESY spectrum of **3**.



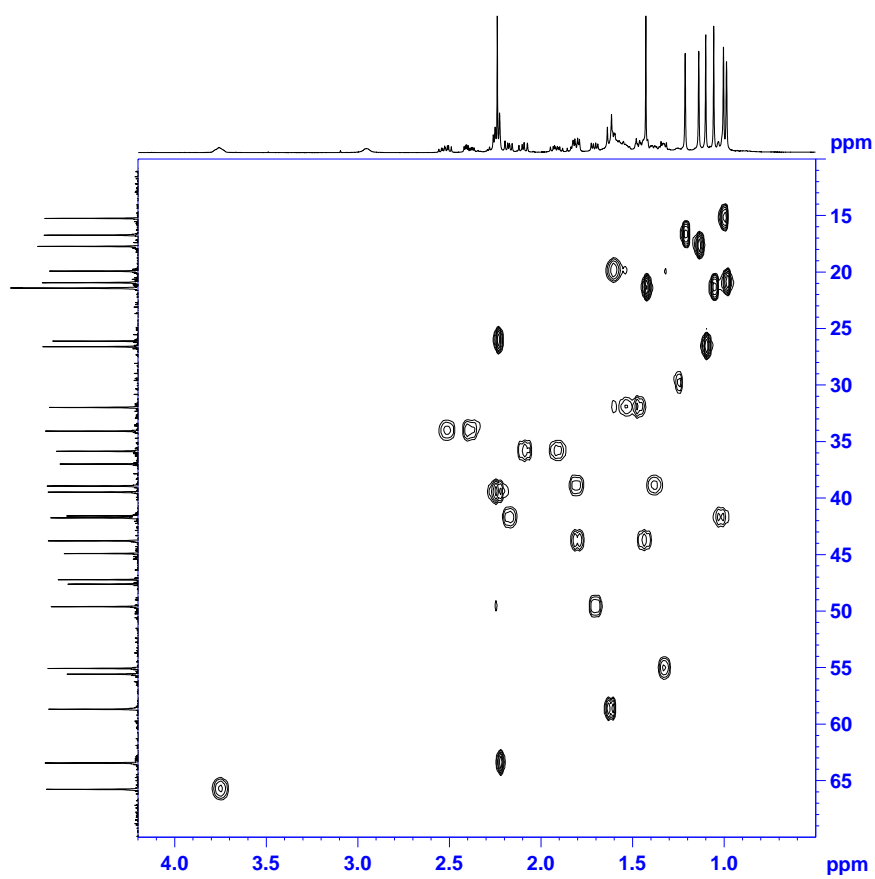

Figure S23. HSQC spectrum of **3**.

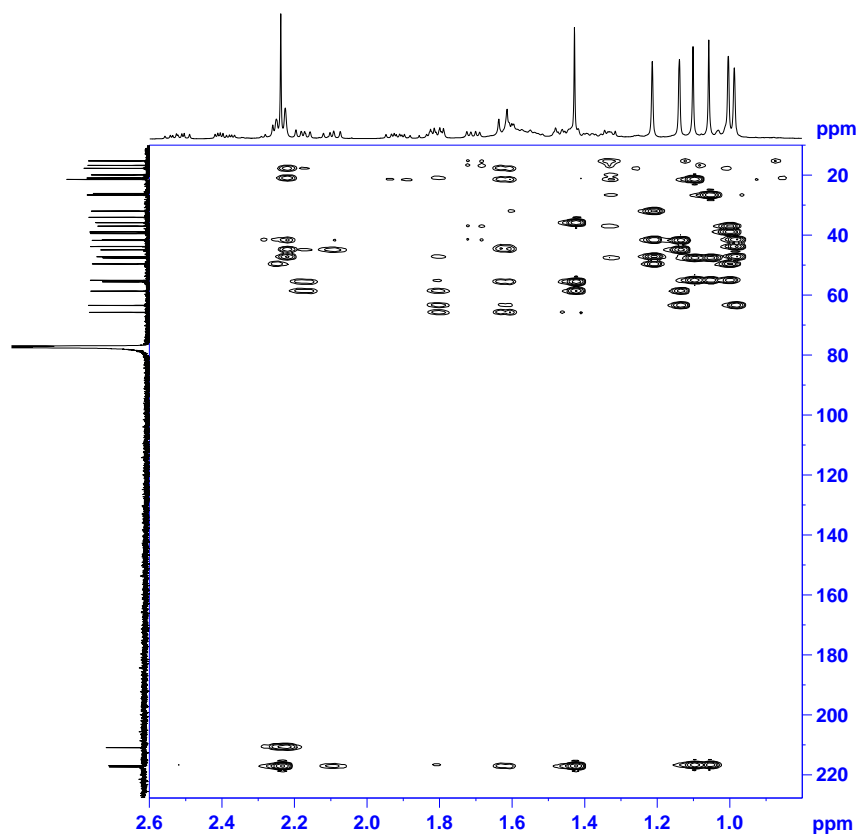

Figure S24. HMBC spectrum of **3**.
